# Supplementary material for: Selective furfural hydrogenolysis towards 2-methylfuran by controlled poisoning of Cu–Co catalysts with chlorine
Source: Royal Society of Chemistry journal article supplement (doi:10.1039/d2re00414c), 2022-12-09
Supplement: d2re00414c1.pdf [file d2re00414c1.pdf]

## Electronic Supplementary Information

### Selective furfural hydrogenolysis towards 2-methylfuran by controlled poisoning of Cu-Co catalysts with chlorine

Alberto Barranca<sup>a</sup>, Iker Agirrezabal-Tellería<sup>a</sup>, Marcos Rellán-Piñeiro<sup>b</sup>, Manuel A. Ortuño<sup>b</sup>, I. Gandarias<sup>a\*</sup>

<sup>a</sup> Department of Chemical and Environmental Engineering, Faculty of Engineering Bilbao, University of the Basque Country UPV/EHU, Plaza Ingeniero Torres Quevedo 1, 48013 Bilbao (Spain).

<sup>b</sup> Centro Singular de Investigación en Química Biolóxica e Materiais Moleculares (CIQUS), Universidade de Santiago de Compostela, 15782 Santiago de Compostela, Spain.

\* Correspondence: [inaki.gandarias@ehu.eus](mailto:inaki.gandarias@ehu.eus); Tel.: +34 94 6017373

| Contents   | Page |
|------------|------|
| 1. Figures | S2   |
| 2. Tables  | S7   |

## 1 Figures

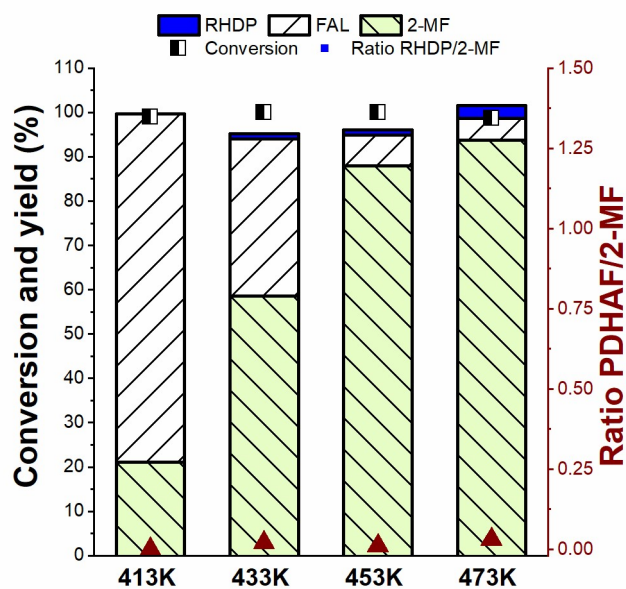

**Figure S1.** Furfural conversion, yield of the different products and RHDP/2-MF ratio for the  $\text{Cu}^{\text{N}}\text{-Co}^{\text{Cl}}/\gamma\text{-Al}_2\text{O}_3$  catalyst at different reaction temperatures. 3 MPa hydrogen,  $0.250 \text{ g}_{\text{cat}} \text{ g}_{\text{FUR}}^{-1}$ , 3.5 h.

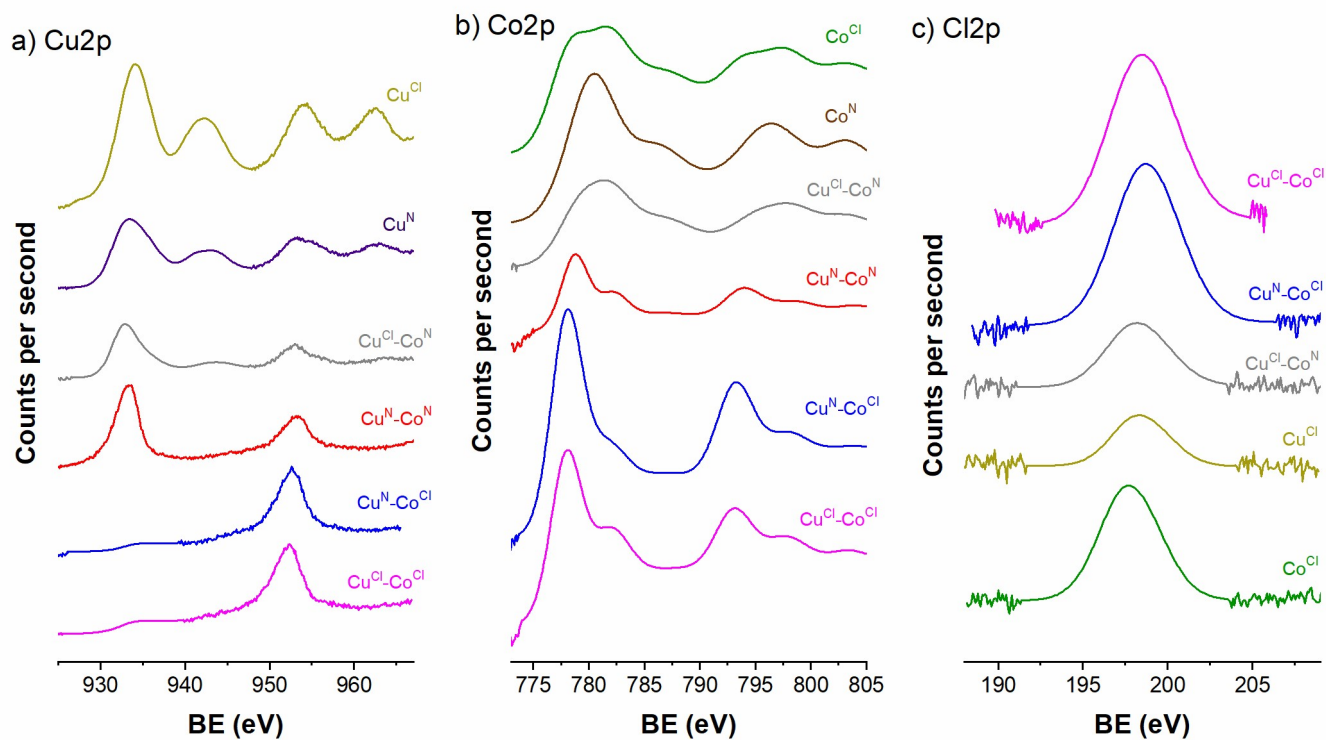

**Figure S2.** Cu 2p core-level (a), Co 2p core-level (b) and Cl 2p core-level (c), spectra of reduced  $\text{Cu}^x\text{-Co}^y/\gamma\text{-Al}_2\text{O}_3$  series.

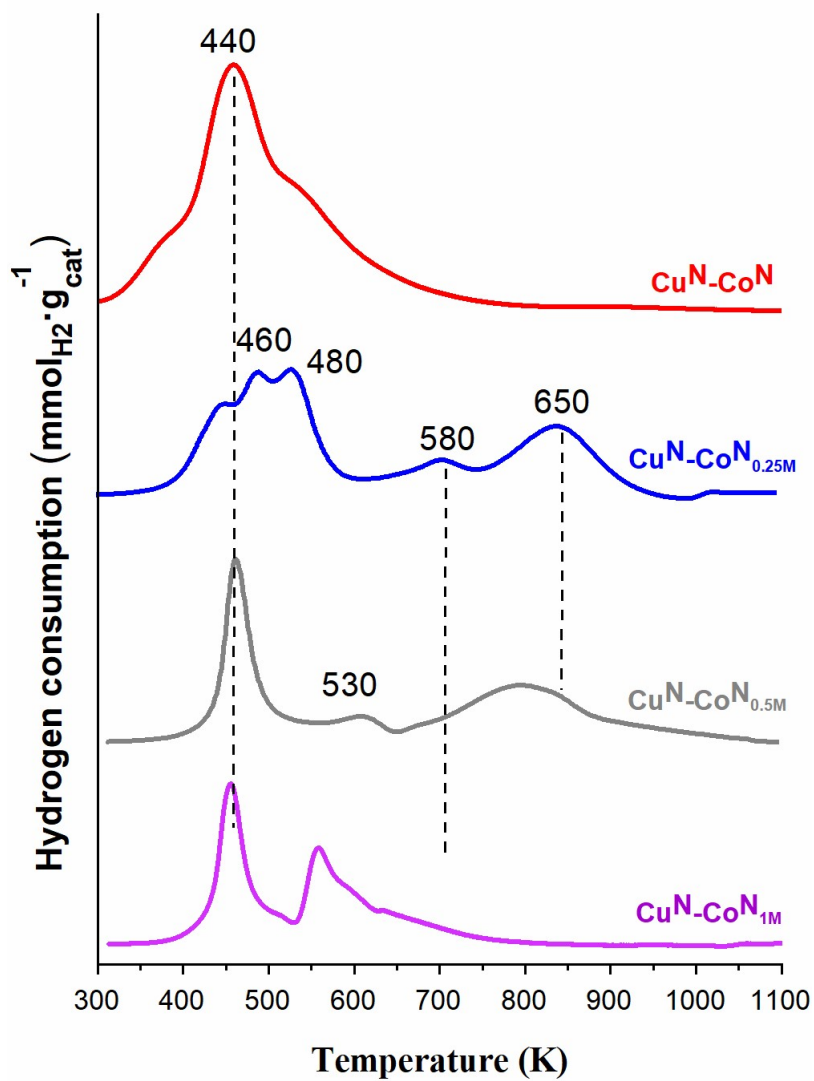

**Figure S3.** H<sub>2</sub>-TPR for bimetallic Cu<sup>N</sup>-Co<sup>N</sup><sub>[x]</sub> catalytic series.

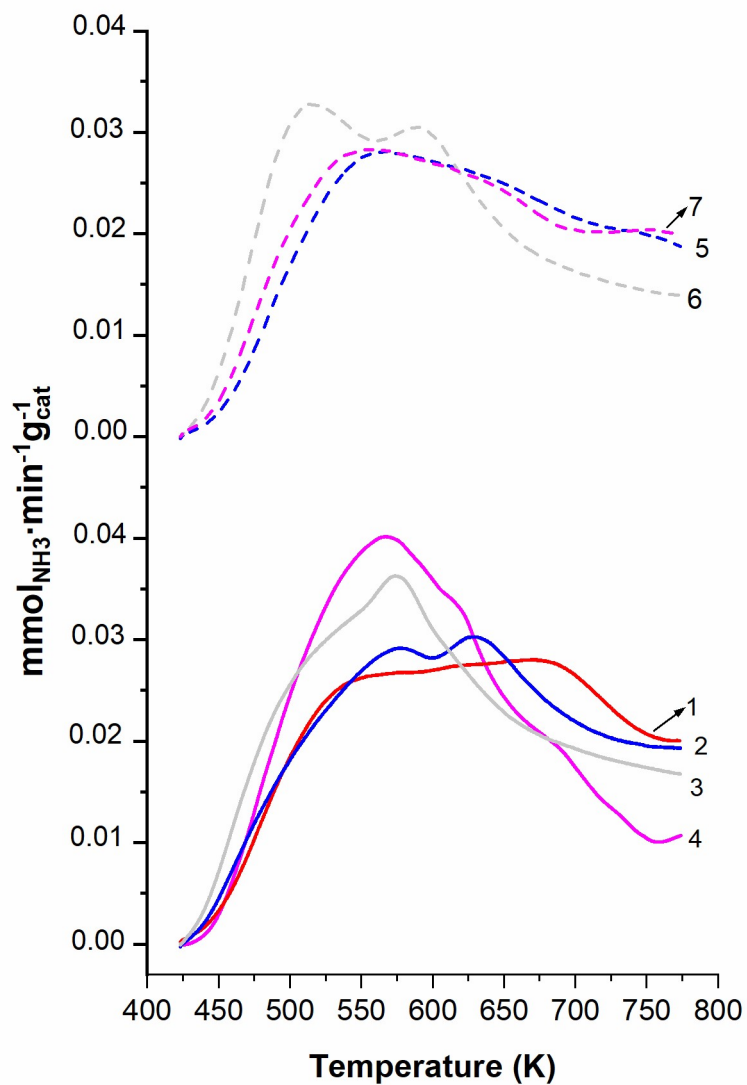

**Figure S4.** TPD-NH<sub>3</sub> profiles for: 1) Cu<sup>N</sup>-Co<sup>N</sup>; 2) Cu<sup>N</sup>-Co<sup>N</sup><sub>[0.25M]</sub>; 3) Cu<sup>N</sup>-Co<sup>N</sup><sub>[0.5M]</sub>; 4) Cu<sup>N</sup>-Co<sup>N</sup><sub>[1M]</sub>; 5) Cu<sup>Cl</sup>-Co<sup>Cl</sup><sub>[0.25M]</sub>; 6) Cu<sup>Cl</sup>-Co<sup>Cl</sup><sub>[0.5M]</sub>; 7) Cu<sup>Cl</sup>-Co<sup>Cl</sup><sub>[1M]</sub>

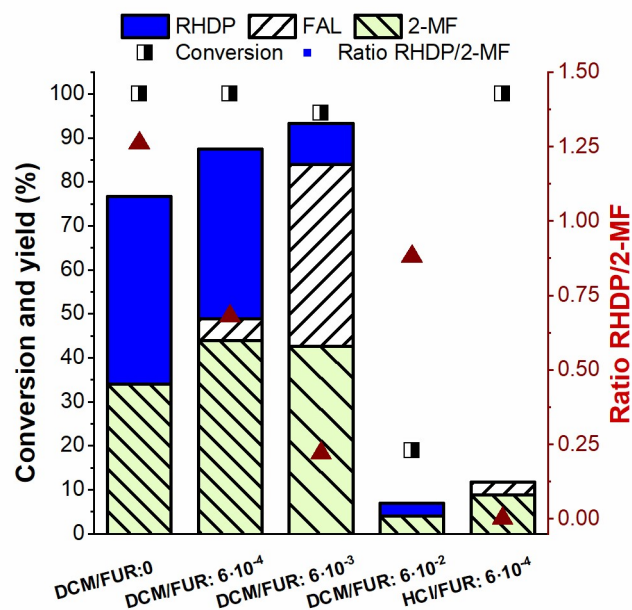

**Figure S5.** Furfural conversion, yield of the different products and RHPD/2-MF ratio for the Cu<sup>N</sup>-Co<sup>N</sup> catalyst at different dichloromethane (DCM):furfural and HCl:furfural ratios in the reaction medium. 3 MPa hydrogen, 0.250 g<sub>cat</sub> g<sub>FUR</sub><sup>-1</sup>, 3.5 h.

## 2 Tables

**Table S1.** Operating conditions and results obtained in the activity tests of the Cu<sup>x</sup>-Co<sup>y</sup> series. All experiments were carried out at a P<sub>H<sub>2</sub></sub> = 30 bar and 3.5 h reaction time.

| Entry | Catalyst<br>/ $\gamma$ -Al <sub>2</sub> O <sub>3</sub> | g <sub>cat</sub> g <sub>FUR</sub> <sup>-1</sup> | T<br>(K) | Conv.<br>(%) | Yield (%) |      |      |      | Ratio<br>RHDP/2-<br>MF | Prod.<br>(mol <sub>2MF</sub> kg <sub>cat</sub> <sup>-1</sup> h <sup>-1</sup> ) | CB<br>(%) |
|-------|--------------------------------------------------------|-------------------------------------------------|----------|--------------|-----------|------|------|------|------------------------|--------------------------------------------------------------------------------|-----------|
|       |                                                        |                                                 |          |              | 2-MF      | FAL  | THFA | PDOs |                        |                                                                                |           |
| 1     | Cu <sup>Cl</sup>                                       | 0.125                                           | 453      | 10.1         | 2.20      | 3.20 | 0.00 | 0.00 | 0.00                   | 0.50                                                                           | 95.3      |
| 2     | Co <sup>N</sup>                                        | 0.125                                           | 453      | 100          | 31.1      | 33.2 | 10.7 | 8.80 | 0.62                   | 7.10                                                                           | 82.0      |
| 3     | Cu <sup>N</sup>                                        | 0.125                                           | 453      | 100          | 9.10      | 79.0 | 0.00 | 0.90 | 0.10                   | 2.08                                                                           | 88.1      |
| 4     | Co <sup>Cl</sup>                                       | 0.125                                           | 453      | 72.0         | 22.1      | 46.5 | 0.00 | 0.00 | 0.00                   | 5.05                                                                           | 98.0      |
| 5     | Cu <sup>Cl</sup> -Co <sup>Cl</sup>                     | 0.125                                           | 453      | 100          | 51.5      | 34.3 | 0.00 | 0.00 | 0.00                   | 11.8                                                                           | 85.8      |
| 6     | Cu <sup>Cl</sup> -Co <sup>N</sup>                      | 0.125                                           | 453      | 100          | 56.5      | 31.5 | 0.00 | 2.30 | 0.04                   | 12.9                                                                           | 90.3      |
| 7     | Cu <sup>N</sup> -Co <sup>Cl</sup>                      | 0.125                                           | 453      | 100          | 61.5      | 36.6 | 0.00 | 0.00 | 0.00                   | 14.1                                                                           | 98.1      |
| 8     | Cu <sup>N</sup> -Co <sup>N</sup>                       | 0.125                                           | 453      | 100          | 34.0      | 0.00 | 17.6 | 25.2 | 1.26                   | 7.77                                                                           | 76.8      |
| 9     | Cu <sup>N</sup> -Co <sup>Cl</sup>                      | 0.250                                           | 413      | 98.7         | 21.3      | 78.6 | 0.00 | 0.00 | 0.00                   | 2.30                                                                           | 98.7      |
| 10    | Cu <sup>N</sup> -Co <sup>Cl</sup>                      | 0.250                                           | 433      | 100          | 58.6      | 30.7 | 0.00 | 1.20 | 0.02                   | 7.10                                                                           | 95.1      |
| 11    | Cu <sup>N</sup> -Co <sup>Cl</sup>                      | 0.250                                           | 453      | 100          | 87.9      | 7.10 | 0.00 | 1.10 | 0.01                   | 10.3                                                                           | 96.1      |
| 12    | Cu <sup>N</sup> -Co <sup>Cl</sup>                      | 0.250                                           | 473      | 100          | 93.8      | 4.90 | 0.70 | 2.20 | 0.03                   | 11.5                                                                           | 100       |

**Table S2.** Operating conditions and results obtained in the activity tests of the Cu<sup>N</sup>-Co<sup>N<sub>[x]</sub></sup> and Cu<sup>Cl</sup>-Co<sup>Cl<sub>[x]</sub></sup> series. Operating conditions: P<sub>H<sub>2</sub></sub> = 30 bar H<sub>2</sub>; T = 453 K; g<sub>cat</sub> g<sub>FUR</sub><sup>-1</sup> = 0.125

| Entry | Catalyst<br>/ $\gamma$ -Al <sub>2</sub> O <sub>3</sub> | Conv.<br>(%) | Yield (%) |      |      |      | Ratio<br>RHDP/2-<br>MF | Product.<br>(mol <sub>2MF</sub> kg <sub>cat</sub> <sup>-1</sup> h <sup>-1</sup> ) | CB<br>(%) |
|-------|--------------------------------------------------------|--------------|-----------|------|------|------|------------------------|-----------------------------------------------------------------------------------|-----------|
|       |                                                        |              | 2-MF      | FAL  | THFA | PDOs |                        |                                                                                   |           |
| 1     | Cu <sup>N</sup> -Co <sup>N</sup>                       | 100          | 34.0      | 0.00 | 17.6 | 25.2 | 1.26                   | 7.77                                                                              | 76.8      |
| 2     | Cu <sup>N</sup> -Co <sup>N<sub>[0.25M]</sub></sup>     | 99.9         | 59.9      | 24.3 | 0.00 | 2.77 | 0.05                   | 13.7                                                                              | 87.4      |
| 3     | Cu <sup>N</sup> ∧Co <sup>N<sub>[0.5M]</sub></sup>      | 100          | 77.2      | 22.0 | 0.00 | 3.89 | 0.05                   | 17.7                                                                              | 103       |
| 4     | Cu <sup>N</sup> ∧Co <sup>N<sub>[1M]</sub></sup>        | 100          | 53.2      | 44.6 | 0.00 | 4.03 | 0.08                   | 12.2                                                                              | 105       |
| 5     | Cu <sup>Cl</sup> -Co <sup>Cl</sup>                     | 100          | 51.5      | 34.3 | 0.00 | 0.00 | 0.00                   | 11.8                                                                              | 85.8      |
| 6     | Cu <sup>Cl</sup> ∧Co <sup>Cl<sub>[0.25M]</sub></sup>   | 97.8         | 51.7      | 48.1 | 0.00 | 0.00 | 0.00                   | 11.8                                                                              | 101       |
| 7     | Cu <sup>Cl</sup> ∧Co <sup>Cl<sub>[0.5M]</sub></sup>    | 92.6         | 21.2      | 70.7 | 0.00 | 0.00 | 0.00                   | 4.83                                                                              | 99.3      |
| 8     | Cu <sup>Cl</sup> ∧Co <sup>Cl<sub>[1M]</sub></sup>      | 41.7         | 8.44      | 47.0 | 1.24 | 0.00 | 0.14                   | 1.93                                                                              | 114       |

**Table S3.** Binding energies for the surface species detected in the reduced Cu<sup>N</sup>-Co<sup>N</sup><sub>[x]</sub> and Cu<sup>Cl</sup>-Co<sup>Cl</sup><sub>[x]</sub> catalytic series.

| XPS Results |                                                       |                                           |                                            |                                           |                                            |                              |          |                                   |                                   |            |
|-------------|-------------------------------------------------------|-------------------------------------------|--------------------------------------------|-------------------------------------------|--------------------------------------------|------------------------------|----------|-----------------------------------|-----------------------------------|------------|
| Entry       | Catalyst /Al <sub>2</sub> O <sub>3</sub>              | Be Cu <sup>0</sup> 2p <sub>3/2</sub> (eV) | Be Cu <sup>2+</sup> 2p <sub>3/2</sub> (eV) | Be Co <sup>0</sup> 2p <sub>3/2</sub> (eV) | Be Co <sup>x+</sup> 2p <sub>3/2</sub> (eV) | Be Cl 2p <sub>3/2</sub> (eV) | % at. Cl | Cu <sup>0</sup> /Cu <sup>2+</sup> | Co <sup>0</sup> /Co <sup>x+</sup> | Cl/(Co+Cu) |
| 1           | Cu <sup>N</sup> -Co <sup>N</sup> <sub>[0.25M]</sub>   | 932.9                                     | -                                          | 778.6                                     | 782.7                                      | 198.5                        | 1.2      | TR                                | 1.2                               | 0.38       |
| 2           | Cu <sup>N</sup> -Co <sup>N</sup> <sub>[0.5M]</sub>    | 933.2                                     | -                                          | 778.5                                     | 782.4                                      | 197.8                        | 2.4      | TR                                | 1.6                               | 0.40       |
| 3           | Cu <sup>N</sup> -Co <sup>N</sup> <sub>[1M]</sub>      | 933.2                                     | -                                          | 778.4                                     | 782.5                                      | 197.6                        | 3.4      | TR                                | 1.2                               | 0.67       |
| 4           | Cu <sup>Cl</sup> -Co <sup>Cl</sup> <sub>[0.25M]</sub> | 932.1                                     | -                                          | 777.6                                     | 781.6                                      | 198.2                        | 3.5      | TR                                | 1.3                               | 0.43       |
| 5           | Cu <sup>Cl</sup> -Co <sup>Cl</sup> <sub>[0.5M]</sub>  | 932.8                                     | -                                          | 778.1                                     | 782.4                                      | 197.6                        | 3.8      | TR                                | 1.1                               | 0.46       |
| 6           | Cu <sup>Cl</sup> -Co <sup>Cl</sup> <sub>[1M]</sub>    | 932.6                                     | -                                          | 777.9                                     | 782.2                                      | 198.0                        | 5.1      | TR                                | 0.5                               | 0.62       |

**Table S4.** Binding energies and percentage of atomic content for the Cl species detected in the spent (after activity test) Cu<sup>N</sup>-Co<sup>N</sup> catalyst with different DCM:FUR and HCl:FUR ratios; and for Cu<sup>N</sup>-Co<sup>N</sup><sub>[0.5M]</sub> after conventional activity test.

| XPS Results |                                                    |                    |                    |                              |          |
|-------------|----------------------------------------------------|--------------------|--------------------|------------------------------|----------|
| Entry       | Catalyst /Al <sub>2</sub> O <sub>3</sub>           | DCM:FUR            | HCl:FUR            | Be Cl 2p <sub>3/2</sub> (eV) | % at. Cl |
| 1           | Cu <sup>N</sup> -Co <sup>N</sup>                   | 6·10 <sup>-4</sup> | 0                  | -                            | 0.5      |
| 2           | Cu <sup>N</sup> -Co <sup>N</sup>                   | 6·10 <sup>-3</sup> | 0                  | 198.3                        | 1.3      |
| 3           | Cu <sup>N</sup> -Co <sup>N</sup>                   | 6·10 <sup>-2</sup> | 0                  | 197.5                        | 2.4      |
| 4           | Cu <sup>N</sup> -Co <sup>N</sup>                   | 0                  | 6·10 <sup>-4</sup> | 198.1                        | 0.4      |
| 5           | Cu <sup>N</sup> -Co <sup>N</sup> <sub>[0.5M]</sub> | 0                  | 0                  | 198.1                        | 2.3      |



**Table S5.** Adsorption energies (eV) of FUR and FAL on Co(111) and Co(0001) in parallel **a** and perpendicular **b** modes at different Cl coverages.

| <b>Adsorption energies / eV</b>       |                |             |               |               |                |
|---------------------------------------|----------------|-------------|---------------|---------------|----------------|
| <b><math>\theta(\text{Cl})</math></b> | <b>Species</b> | <b>Mode</b> | <b>Mode a</b> | <b>Mode b</b> | <b>(a – b)</b> |
| 0.00                                  | FUR            | Co(111)     | -1.93         | -0.84         | -1.09          |
|                                       | FUR            | Co(0001)    | -2.04         | -0.85         | -1.19          |
|                                       | FAL            | Co(111)     | -1.66         | -0.82         | -0.84          |
|                                       | FAL            | Co(0001)    | -1.74         | -0.83         | -0.91          |
| 0.06                                  | FUR            | Co(111)     | -1.95         | -0.88         | -1.07          |
|                                       | FUR            | Co(0001)    | -2.08         | -0.91         | -1.17          |
|                                       | FAL            | Co(111)     | -1.71         | -0.86         | -0.85          |
|                                       | FAL            | Co(0001)    | -1.87         | -0.89         | -0.98          |
| 0.25                                  | FUR            | Co(111)     | -1.07         | -0.91         | -0.16          |
|                                       | FUR            | Co(0001)    | -1.14         | -0.91         | -0.23          |
|                                       | FAL            | Co(111)     | -1.17         | -0.88         | -0.29          |
|                                       | FAL            | Co(0001)    | -1.28         | -0.89         | -0.39          |
| 0.31                                  | FUR            | Co(111)     | -0.56         | -1.04         | +0.48          |
|                                       | FUR            | Co(0001)    | -0.41         | -1.18         | +0.77          |
|                                       | FAL            | Co(111)     | -0.44         | -1.07         | +0.63          |
|                                       | FAL            | Co(0001)    | -0.57         | -1.12         | +0.55          |
